# Supplementary material for: Rhodium-catalyzed cysteine modification with diazo reagents
Source: Royal Society of Chemistry journal article supplement (doi:10.1039/c2cc37323h), 2012-11-14
Supplement: c2cc37323h.pdf [file c2cc37323h.pdf]

# Rhodium-catalyzed cysteine modification with diazo reagents

Rituparna Kundu, Zachary T. Ball\*

*Department of Chemistry, Rice University, MS 60, 6100 Main Street, Houston, Texas 77005*  
*zb1@rice.edu*

## Supporting Information

### Contents

|                                                                                                              |     |
|--------------------------------------------------------------------------------------------------------------|-----|
| General Considerations. ....                                                                                 | S2  |
| Experimental.....                                                                                            | S3  |
| Synthesis of known compounds. ....                                                                           | S3  |
| Modification of CALP (10 $\mu$ M):.....                                                                      | S3  |
| General Procedure for Trypsin Digestion of Modified CALP and MS/MS Analysis of Modified CALP Peptides: ..... | S3  |
| General Procedure for Blocking Cysteine residue on CALP: <sup>7</sup> .....                                  | S4  |
| Control Reactions for Modification of CALP:.....                                                             | S4  |
| General Protocol for the Modification of Peptides (25 $\mu$ M) :.....                                        | S5  |
| General protocol for the Modification of Peptide AQPADRCGGLA using Biotin-Maleimide: .....                   | S6  |
| General Protocol for Stability Study of S-C Linkages in Human Plasma Serum:.....                             | S6  |
| Rh <sub>2</sub> (OAc) <sub>4</sub> Catalyzed Modification of CALP in a Mixture of Other Proteins: .....      | S6  |
| Biotin-Maleimide Catalyzed Modification of CALP in a Mixture of Other Proteins: ....                         | S6  |
| Western Blot Analysis .....                                                                                  | S6  |
| Characterization for AQPADRXCGLA (X= R, K, A) Peptides:.....                                                 | S7  |
| References .....                                                                                             | S10 |

## General Considerations.

Solvents and reagents were purchased from Fisher Scientific (unless mentioned otherwise) and used as received. Millipore ultra-purified water (18 M $\Omega$ ) was used in all cases.

**Peptide synthesis.** All peptides were manually synthesized using standard solid-phase Fmoc protocols.<sup>1,2</sup> Rink amide MBHA resin (AAPTEC) to afford C-terminal amides. The peptides were acetylated at the N-terminus prior to cleavage from the resin. The purification was accomplished by reverse-phase HPLC with gradients of water-acetonitrile containing 0.1% trifluoroacetic acid, and peptides were isolated by lyophilization. Analysis and purity assessment was attained by mass spectrometry and analytical HPLC.

**HPLC.** HPLC was performed on a Shimadzu CBM-20A instrument with Phenomenex Jupiter 4 $\mu$  Proteo 90A (250  $\times$  15 mm preparative) and Phenomenex Jupiter 4 $\mu$  Proteo 90A (250  $\times$  4.6 mm analytical) columns. Flow rates of 8 mL/min and 1 mL/min were used for preparative and analytical columns, respectively. Analytical and preparative HPLC were performed with gradient of acetonitrile in water. Both solvents contained 0.1% trifluoroacetic acid (TFA) unless otherwise noted. Data was collected using UV-vis absorption at 220 nm and 300 nm.

## Mass Spectrometry.

MALDI-TOF MS and MS/MS analyses were performed on a Bruker Daltonics Autoflex MALDI-TOF/TOF mass spectrometer with  $\alpha$ -cyano-4-hydroxycinnamic acid matrix (CHCA, Thermo Scientific, 10 mg/mL) for peptide samples and 2,4-dihydroxyacetophenone (DHAP, Fluka, 10 mg/mL) for protein samples. ESI-MS was performed on a Bruker Daltonics microTOF instrument. Data analysis was performed on mMass program.<sup>3,4</sup>

## Experimental

### Synthesis of known compounds.

The protein CALP<sup>5</sup> and biotin diazo<sup>6</sup> reagent **1** was prepared and purified according to published procedures.

### Modification of CALP (10 $\mu$ M):

To a 250  $\mu$ L microcentrifuge tube, 68.7  $\mu$ L of millipore water was added, along with 10  $\mu$ L aqueous solution of tert-butyl hydroxylamine hydrochloride (100 mM, pH 6.2). To this 10  $\mu$ L of CALP (100  $\mu$ M) was added, followed by the addition of 1  $\mu$ L aqueous solution of Rh<sub>2</sub>(OAc)<sub>4</sub> (1 mM). The reaction mixture was vortexed briefly and 1.7  $\mu$ L t-butanol solution of the biotin-diazo **1** (60 mM) was added in the end. The reaction mixture was centrifuged and then incubated on a laboratory low speed shaker at 4 °C for 5 h. The reaction mixture was quenched using 20  $\mu$ L of MeCN and then analyzed using MALDI-TOF.

The rhodium catalyst can be removed along with other small molecules like biotin diazo by desalting the reaction mixture using a  $\mu$ C18 ZipTip<sup>®</sup> pipet tip.

### General Procedure for Trypsin Digestion of Modified CALP and MS/MS Analysis of Modified CALP Peptides:

100  $\mu$ L of the CALP (20  $\mu$ M) modification reaction mixture was centrifuged and then heated at 65 °C in a water bath for 30 min. This was diluted with 100  $\mu$ L aqueous solution of NH<sub>4</sub>HCO<sub>3</sub> (80 mM, pH 7.8) followed by the addition of 1.1  $\mu$ L of trypsin solution (Promega, 100  $\mu$ g reconstituted in 100  $\mu$ L of 50 mM acetic acid). The digest was incubated at 37 °C for 6 h. The crude digest was desalted using  $\mu$ C18 ZipTip<sup>®</sup> pipet tip and then analyzed by MALDI-TOF. After analyzing the digestion data using mMass program, MS/MS was performed on the singly modified peptide fragment  $m/z = 2441$  using MALDI-TOF.

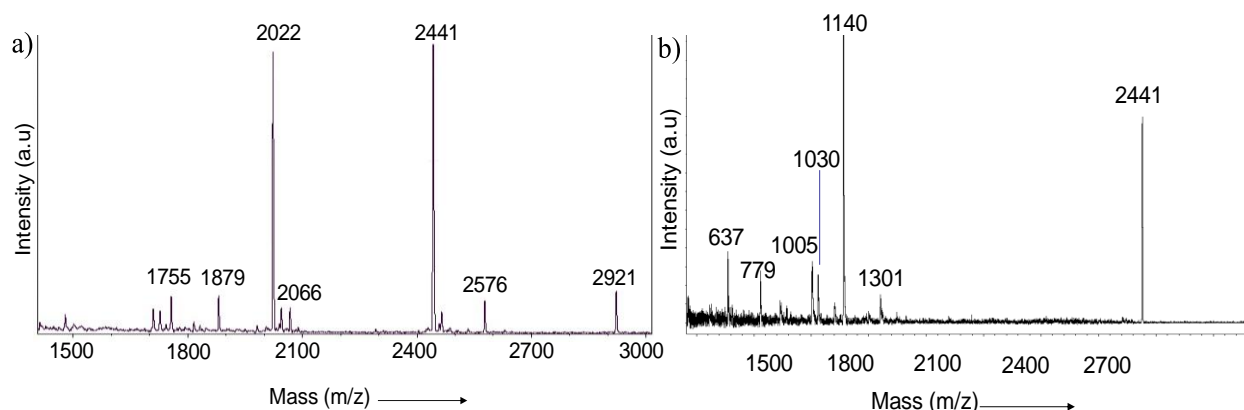

**Figure S1.** a) Modified CALP tryptic digest. Native peptide fragment containing C44, expected  $m/z = 1879$ ; singly-modified, expected  $m/z = 2441$ . ( $m/z = 2022$  corresponds to native peptide fragment V6-K24 + K<sup>+</sup> adduct) b) MS/MS sequencing of singly modified fragment,  $m/z = 2441$  (Detailed analysis shown in communication).

### General Procedure for Blocking Cysteine residue on CALP:<sup>7</sup>

In a 2 mL centrifuge tube, 3 mg of lyophilized CALP was taken and dissolved in 1.5 mL Na<sub>2</sub>SO<sub>3</sub> buffer\* and incubated at 25 °C for 1 h keeping the tube open. The blocked protein solution is then desalted by dialyzing it in PDZ buffer\* (pH 7.4).

\*Na<sub>2</sub>SO<sub>3</sub> buffer recipe– 0.05 M Na<sub>2</sub>SO<sub>3</sub>, 0.2 mM cysteine, 6 M guanidine hydrochloride, 0.1 M Tris chloride (pH 8.4).

PDZ buffer recipe – 5% glycerol, 25 mM Na<sub>3</sub>PO<sub>4</sub>, 150 mM NaCl, 0.02% NaN<sub>3</sub>, 0.1 mM TCEP (pH 7.4).

### Control Reactions for Modification of CALP:

- In absence of Rh<sub>2</sub>(OAc)<sub>4</sub>: To a 250 μL microcentrifuge tube, 69.7 μL of millipore water was added, along with 10 μL aqueous solution of tert-butyl hydroxylamine hydrochloride (100 mM, pH 6.2). To this 10 μL of CALP (100 μM) was added. The reaction mixture was vortexed briefly and 1.7 μL t-butanol solution of the biotin-diazo **1** (60 mM) was added in the end. The reaction mixture was centrifuged and then incubated on a laboratory low speed shaker at 4 °C for 5 h. The reaction mixture was quenched using 20 μL of MeCN and then analyzed using MALDI-TOF.
- In absence of diazo **1**: To a 250 μL microcentrifuge tube, 70.4 μL of millipore water was added, along with 10 μL aqueous solution of tert-butyl hydroxylamine hydrochloride (100 mM, pH 6.2). To this 10 μL of CALP (100 μM) was added, followed by the addition of 1 μL aqueous solution of Rh<sub>2</sub>(OAc)<sub>4</sub> (1 mM). The reaction mixture was centrifuged and then incubated on a laboratory low speed shaker at 4 °C for 5 h. The reaction mixture was quenched using 20 μL of MeCN and then analyzed using MALDI-TOF.

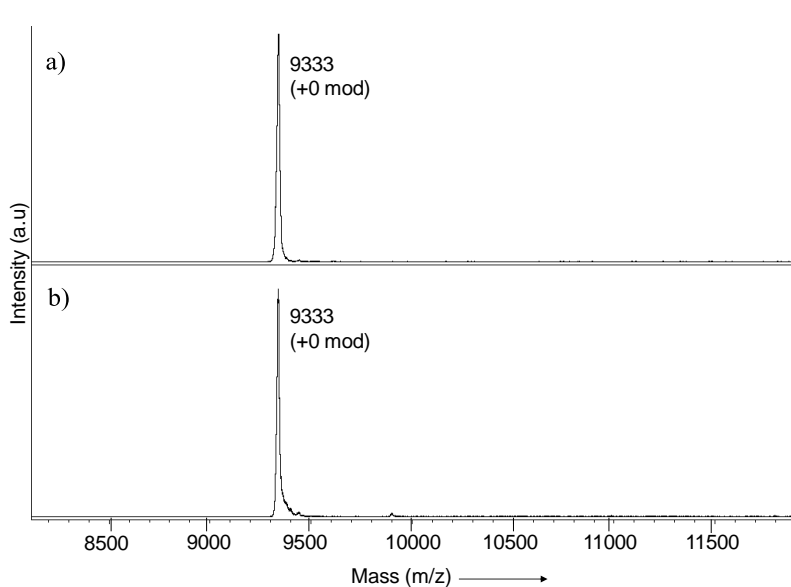

**Figure S2.** a) Control reaction in absence of the catalyst Rh<sub>2</sub>(OAc)<sub>4</sub>.

b) Control reaction in absence of diazo reagent **1**.

### General Protocol for the Modification of Peptides (25 $\mu\text{M}$ ) :

To a 250  $\mu\text{L}$  microcentrifuge tube, 85.3  $\mu\text{L}$  of millipore water was added, along with 10  $\mu\text{L}$  aqueous solution of tert-butyl hydroxylamine hydrochloride (100 mM, pH 6.2). To this 2.5  $\mu\text{L}$  of peptide (1 mM) was added, followed by the addition of 0.25  $\mu\text{L}$  aqueous solution of  $\text{Rh}_2(\text{OAc})_4$  (1 mM). The reaction mixture was vortexed briefly and 2  $\mu\text{L}$  t-butanol solution of the biotin-diazo **1** (60 mM) was added in the end. The reaction mixture was centrifuged and then incubated on a laboratory low speed shaker at 4  $^\circ\text{C}$  for 5 h. The reaction mixture was quenched using 20  $\mu\text{L}$  of MeCN and then analyzed using MALDI-TOF.

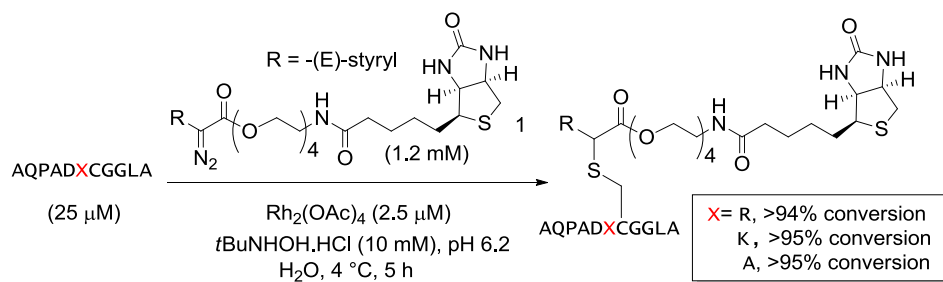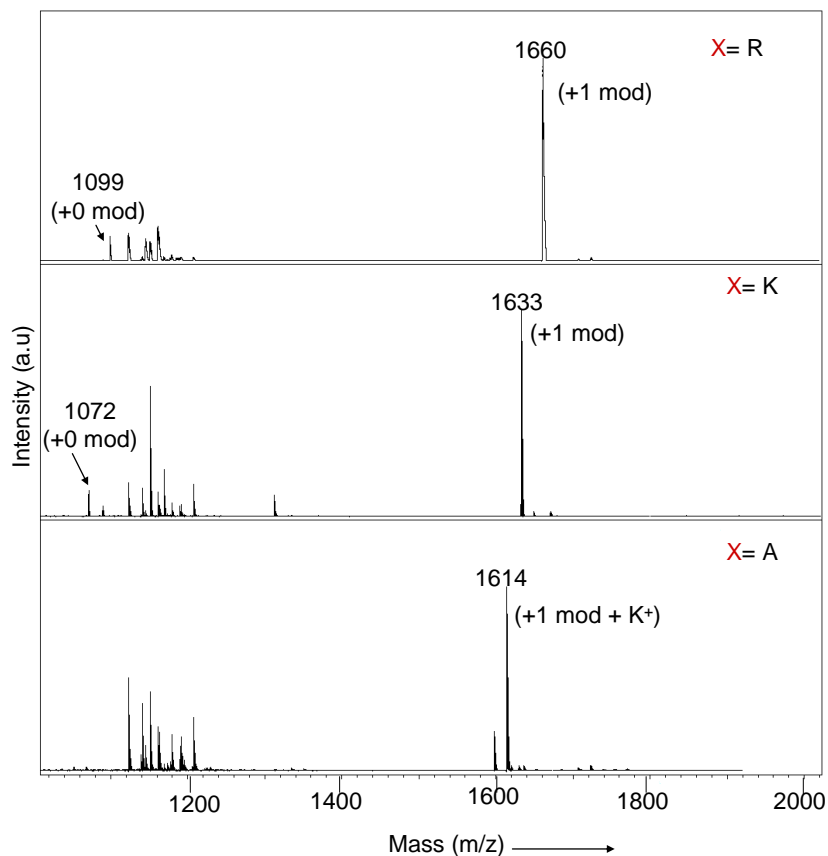

**Figure S6.** Modification of peptides AQPADXCGGLA (X= R, K, A), catalyzed by  $\text{Rh}_2(\text{OAc})_4$  using diazo **1**.

### **General protocol for the Modification of Peptide AQPADRCGGLA using Biotin-Maleimide:**

To a 500  $\mu\text{L}$  centrifuge tube, 314  $\mu\text{L}$  of millipore water was added, along with 36.4  $\mu\text{L}$  of buffer\*. To this 9.1  $\mu\text{L}$  of AQPADRCGGLA (1 mM) was added, followed by the addition of 4.55  $\mu\text{L}$  of biotin-maleimide (Sigma Aldrich, 1 mM solution in DMF). The reaction mixture was centrifuged and then incubated on a laboratory low speed shaker at 4  $^{\circ}\text{C}$  for 5 h. The reaction mixture was analyzed using MALDI-TOF. This was lyophilized and used in the stability study in human plasma serum.

\*Buffer recipe – 100 mM  $\text{Na}_3\text{PO}_4$ , 5 mM EDTA, pH 7.5.

### **General Protocol for Stability Study of S-C Linkages in Human Plasma Serum:**

To a 500  $\mu\text{L}$  centrifuge tube containing the lyophilized modified peptide, 200  $\mu\text{L}$  of human plasma serum (Fischer Scientific) was added, along with 2  $\mu\text{L}$  of phenylmethanesulfonyl fluoride (100 mM solution in isopropanol). The reaction mixture was centrifuged and then incubated at 37  $^{\circ}\text{C}$ . At different time intervals, 10  $\mu\text{L}$  aliquots of the reaction mixture were taken out and quenched with 60  $\mu\text{L}$  of MeCN. This was centrifuged and the solution was analyzed using MALDI-TOF.

### **$\text{Rh}_2(\text{OAc})_4$ Catalyzed Modification of CALP in a Mixture of Other Proteins:**

To a 250  $\mu\text{L}$  microcentrifuge tube, 67.95  $\mu\text{L}$  of millipore water was added, along with 10  $\mu\text{L}$  aqueous solution of tert-butyl hydroxylamine hydrochloride (100 mM, pH 6.2). To this 15  $\mu\text{L}$  of CALP (100  $\mu\text{M}$ ) was added, followed by the addition of 3  $\mu\text{L}$  of BioRad polypeptide standard<sup>†</sup>. The reaction mixture was vortexed briefly and 1.5  $\mu\text{L}$  aqueous solution of  $\text{Rh}_2(\text{OAc})_4$  (1 mM) was added to it. Finally 2.55  $\mu\text{L}$  of biotin-diazo **1** (60 mM solution in t-butanol) was added. The reaction mixture was centrifuged and then incubated on a laboratory low speed shaker at 4  $^{\circ}\text{C}$  for 5 h. The reaction mixture was quenched using 20  $\mu\text{L}$  of MeCN and then analyzed using Western blot.

<sup>†</sup> 3  $\mu\text{L}$  of Biorad polypeptide standard contains 13.5  $\mu\text{g}$  of the proteins aprotinin,  $\alpha$ -lactalbumin, myoglobin and triose-phosphate isomerase (TIM).

### **Biotin-Maleimide Catalyzed Modification of CALP in a Mixture of Other Proteins:**

To a 250  $\mu\text{L}$  microcentrifuge tube, 89  $\mu\text{L}$  of buffer\* was added, along with 3  $\mu\text{L}$  of CALP (500  $\mu\text{M}$ ) and 3  $\mu\text{L}$  of BioRad polypeptide standard<sup>†</sup>. The reaction mixture was vortexed briefly and 5  $\mu\text{L}$  of biotin-maleimide (Sigma Aldrich, 5 mM solution in DMF) was added to it. The reaction mixture was centrifuged and then incubated on a laboratory low speed shaker at 4  $^{\circ}\text{C}$  for 5 h. The reaction mixture was quenched using 20  $\mu\text{L}$  of MeCN and then analyzed using Western blot.

\*Buffer recipe – 100 mM  $\text{Na}_3\text{PO}_4$ , 5 mM EDTA, pH 7.5.

<sup>†</sup> 3  $\mu\text{L}$  of Biorad polypeptide standard contains 13.5  $\mu\text{g}$  of the proteins aprotinin,  $\alpha$ -lactalbumin, myoglobin and triose-phosphate isomerase (TIM).

**Western Blot Analysis.** A crude reaction sample (0.50  $\mu\text{L}$ ) was analyzed directly by SDS-PAGE (10% Tris-Tricine gel, Invitrogen). Proteins were then transferred to a nitrocellulose membrane (GE Healthcare), which was subsequently blocked in 8% milk (8% milk in 100 mL TBS-T\*) for 2 h. The membrane was incubated with avidin-horseradish peroxidase conjugate (blotting grade, Bio-Rad) solution (1% in TBS-T) for 1 h, followed by washing with TBS-T (3  $\times$  5 min) and TBS (1 $\times$ 15 min). Blots were developed with chemiluminescent

substrate (RapidStep ECL Reagent, Calbiochem) and images recorded with a Fujifilm LAS-4000 instrument. An estimate of the extent of biotinylation was obtained by comparison to control lanes of authentic HRP-biotin standard (Invitrogen) and quantified using Multi Gauge Version 3.0.

\*TBS recipe: 2.4 g tris base, 29.22 g NaCl, was dissolved in 900 mL water, and adjusted to pH 7.5 and then the volume was made up to 1 L.

TBS-T recipe: 1 mL of Tween 20 in 500 mL of TBS solution.

### Characterization for AQPADRCGGLA (X= R, K, A) Peptides:

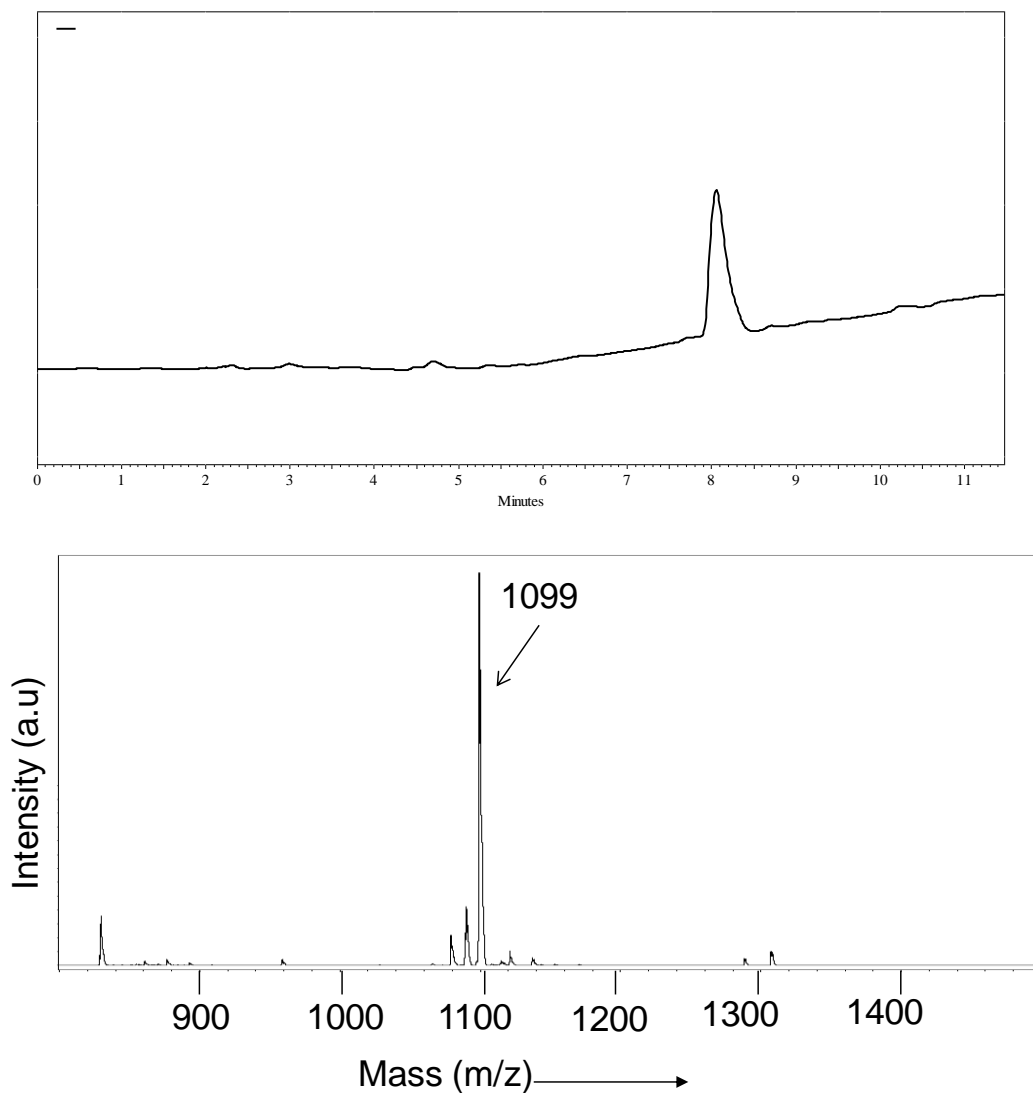

**Figure S3.** HPLC trace and MALDI-MS of peptide AQPADRCGGLA

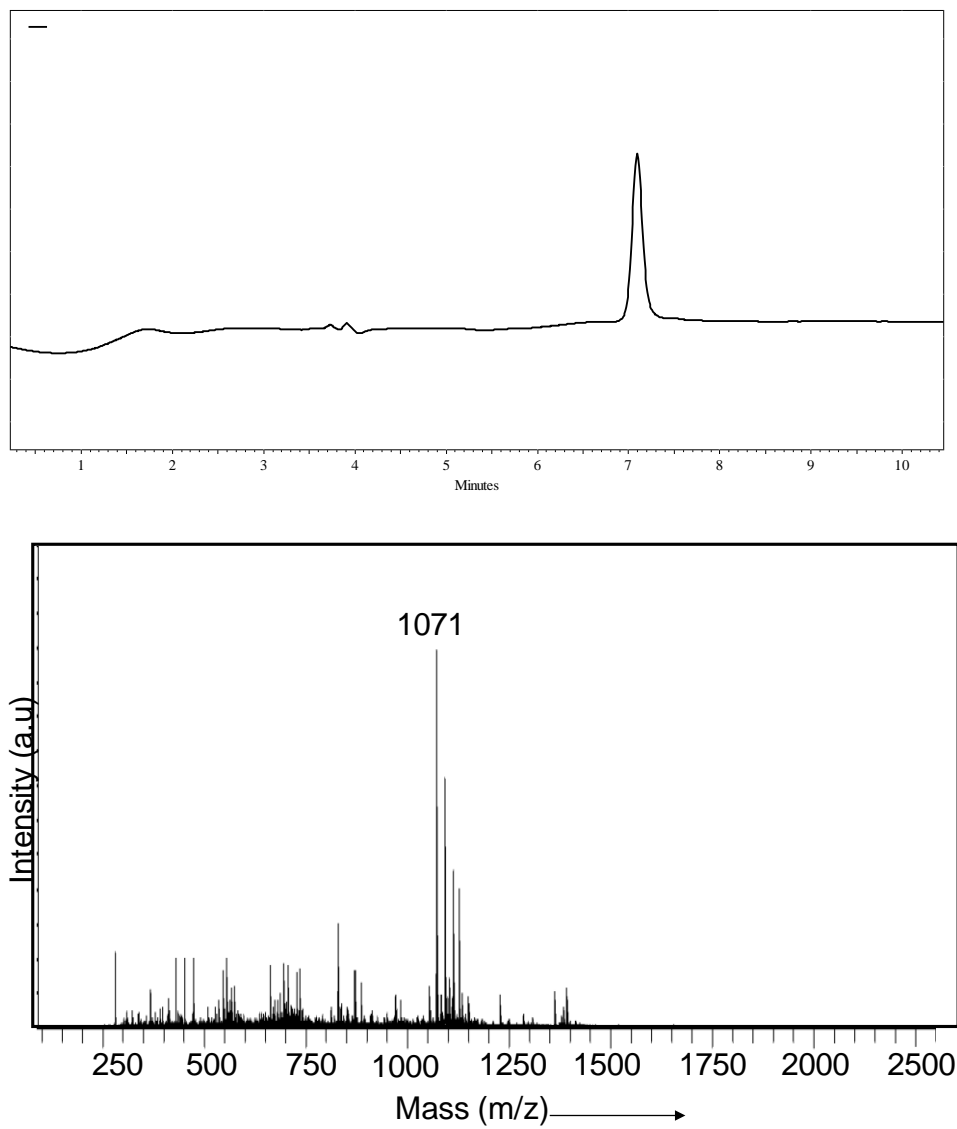

**Figure S4.** HPLC trace and ESI-MS of peptide AQPADKCGGLA



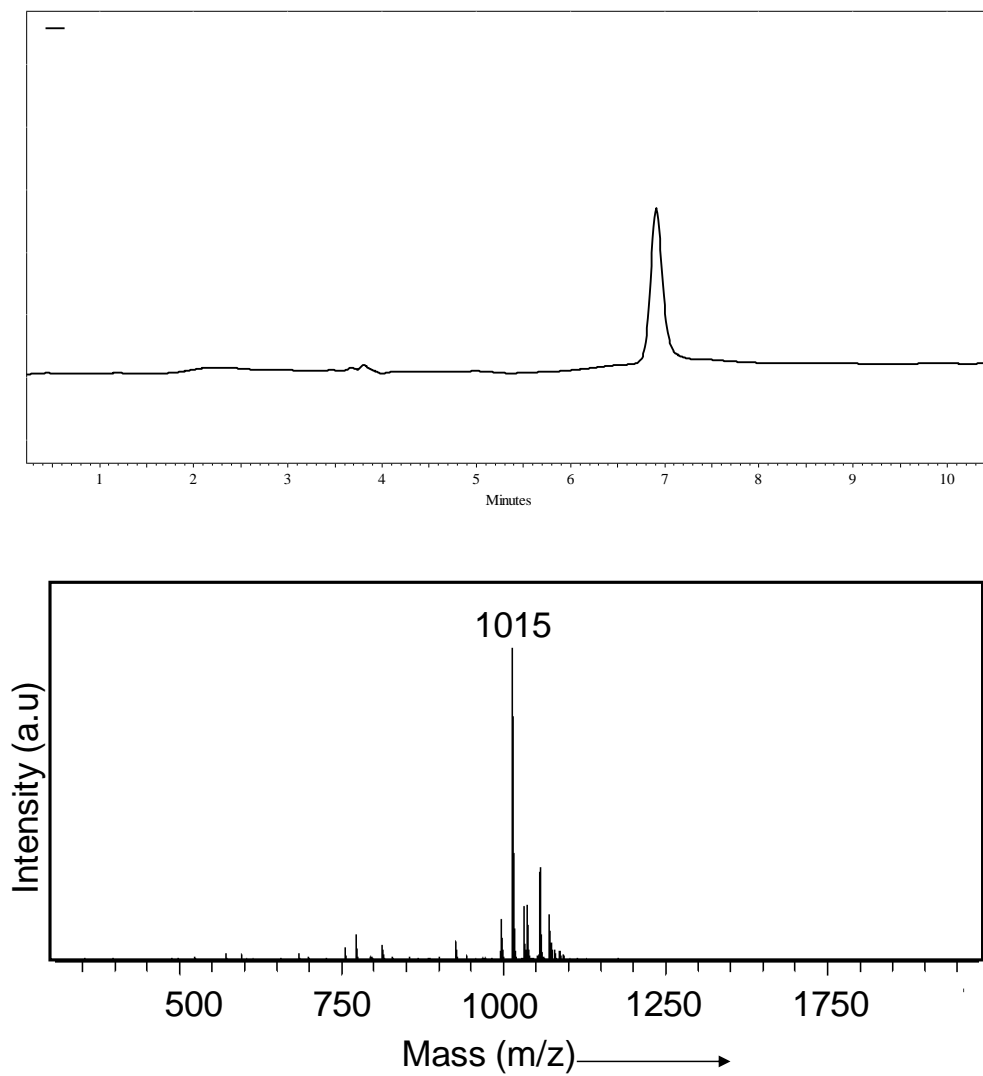

**Figure S5.** HPLC trace and ESI-MS of peptide AQPADACGGLA

## References

- (1) Wellings, D. A.; Atherton, E. *In Solid-Phase Peptide Synthesis* 1997, 289, 44.
- (2) Wellings, D. A.; Atherton, E. *In Methods Enzymol* 1997, 289, 44.
- (3) Strohalm, M.; Hassman, M.; Košata, B.; Kodíček, M. *Rapid Commun. Mass Spectrom.* 2008, 22, 905.
- (4) Strohalm, M.; Kavan, D.; Novák, P.; Volný, M.; Havlíček, V. r. *Anal. Chem.* 2010, 82, 4648.
- (5) Amacher, J. F.; Cushing, P. R.; Weiner, J. A.; Madden, D. R. *Acta Crystallographica Section F* 2011, 67, 600.
- (6) Chen, Z.; Popp, B. V.; Bovet, C. L.; Ball, Z. T. *ACS Chem. Biol.* 2011, 6, 920.
- (7) Crankshaw, M. W.; Grant, G. A. *Curr. Protoc. Protein Sci. / editorial board, John E. Coligan [et al.]* 2001, Chapter 15, 15.01.09.
